# Supplementary material for: Robust derivation of epicardium and its differentiated smooth muscle cell progeny from human pluripotent stem cells
Source: PubMed Central journal article supplement (PMC4392600; doi:10.1242/dev.119271), 2015-04-15
Supplement: supp_dev.119271_DEV119271supp.pdf [file supp_dev.119271_DEV119271supp.pdf]

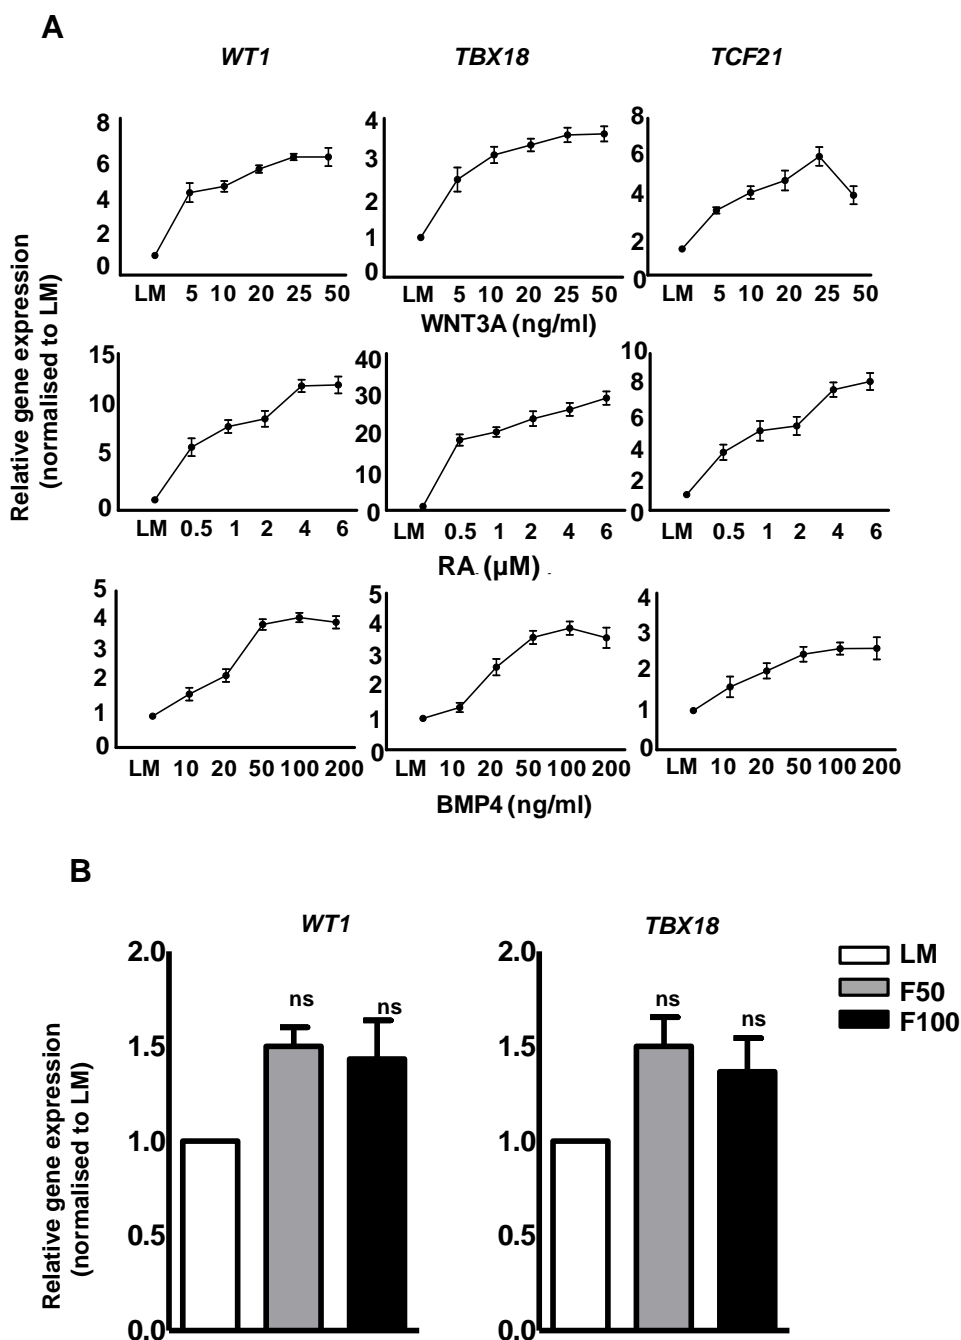

**Fig. S1 Titration of WNT3A, BMP4 and RA and their effect on epicardial gene expression.** (A) High expression of *TBX18*, *WT1* and *TCF21* was noted with increasing doses of WNT3A. Highest expression of all three epicardial genes was observed at a final concentration of 25 ng/ml. Enhanced epicardial gene expression was noted in cultures supplemented with 4  $\mu$ M and 6  $\mu$ M of all trans retinoic acid (RA). Enriched expression of epicardial markers was noted with increasing doses of BMP4 which plateaued at higher concentrations (50, 100 and 200 ng/ml). (B) Analysis of epicardial markers in LM cells differentiated with two different concentrations of FGF2. No significant induction in the expression of *TBX18* and *WT1* was observed.

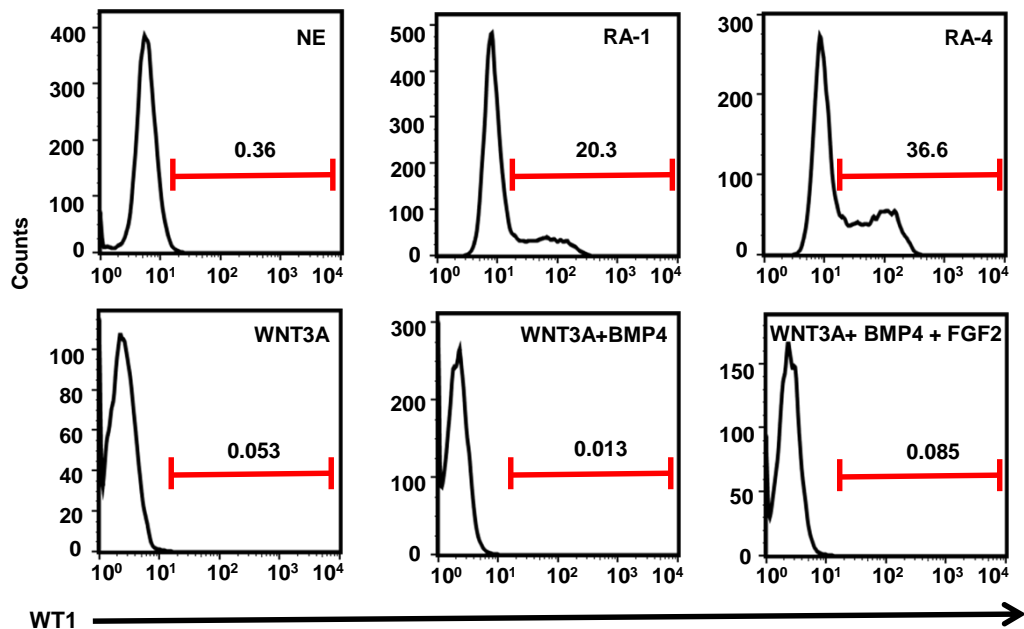

**Fig. S2. Flow cytometric analysis of WT1 expression in cells differentiated using WNT3A and RA treated cells.** Lateral plate mesoderm cells differentiated with WNT3A, WNT3A+BMP4 and WNT3A+BMP4+FGF2 failed to induce any WT1 expression in the differentiated cells after 10 days of differentiation. Addition of RA promoted expression of WT1 in the differentiated cells. A higher concentration of RA (4  $\mu$ M) resulted in a larger percentage of WT1<sup>+</sup> cells compared to cells differentiated with a lower concentration of RA (1  $\mu$ M). H9-derived neuroectoderm (NE) cells were used as a negative control.

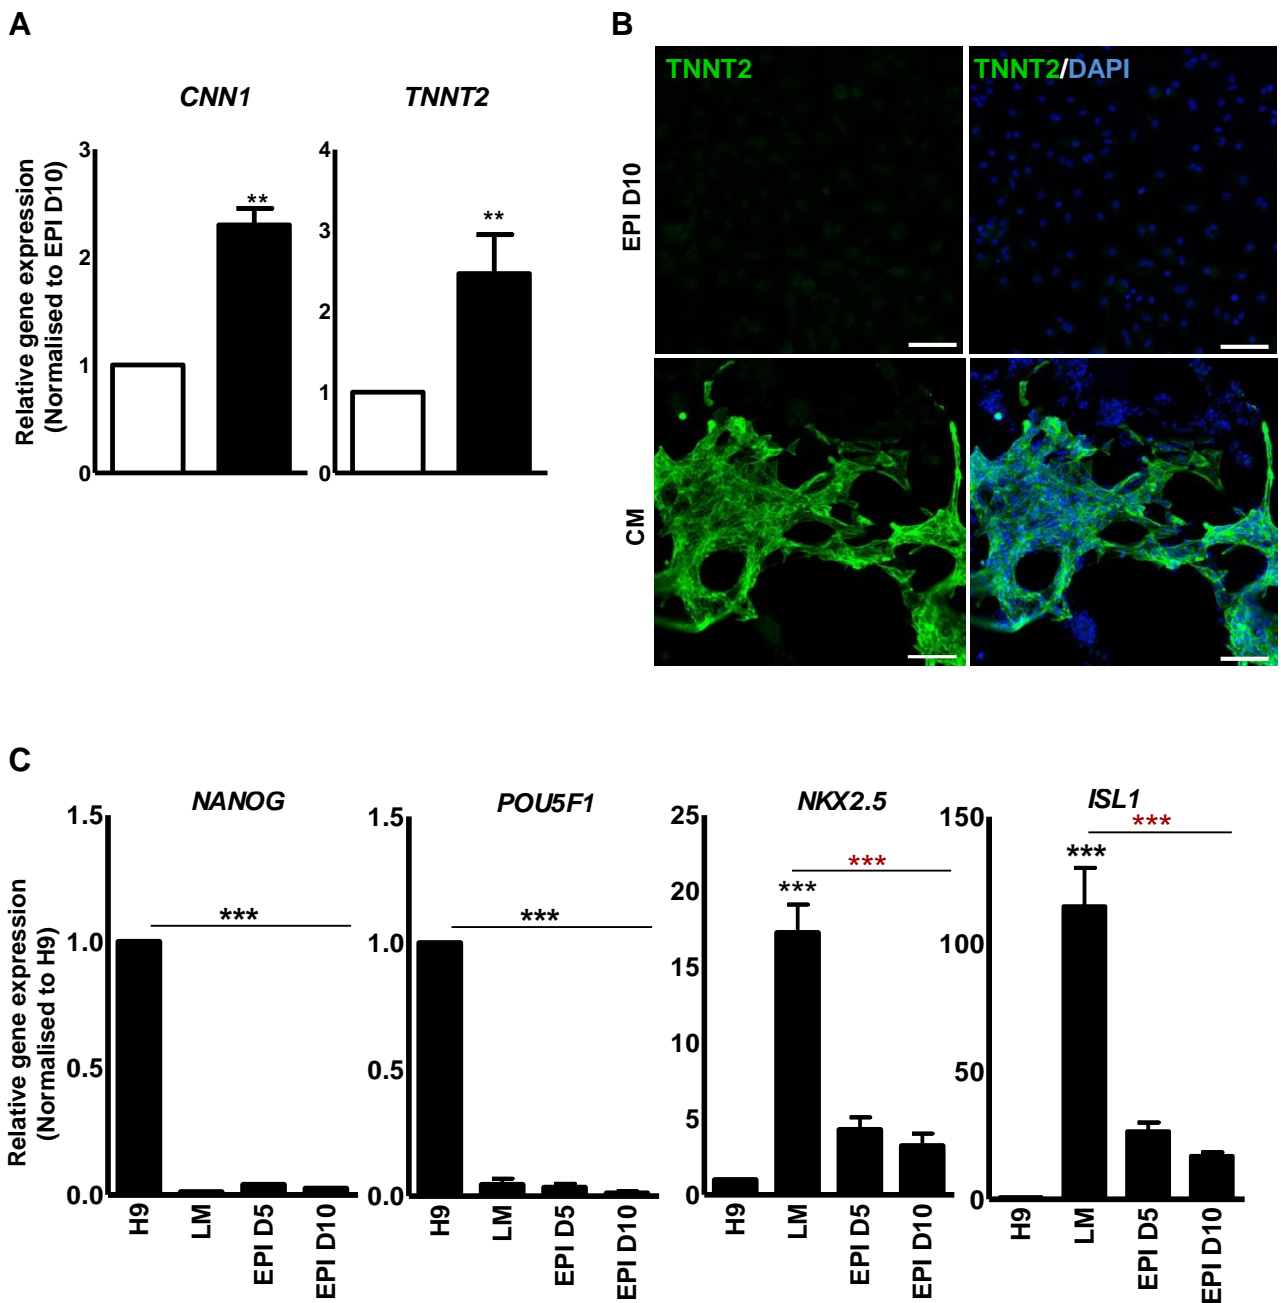

**Fig. S3. HESC-derived epicardial cells express SMC and cardiomyocyte markers at longer periods of differentiation.** (A) Analysis of SMC (*CNN1*) and cardiomyocyte (*TNNT2*) markers in the LM-derived day 10 (EPI D10) and day15 (EPI D15) epicardial cells by qRT-PCR. \*\*\* $P < 0.001$ , \*\* $P < 0.01$ . (B) Immunocytochemical analysis of *TNNT2* in EPI D10 and H9-derived cardiomyocytes (CM). (C) Analysis of pluripotency (*NANOG*, and *POU5F1*) and LM (*NKX2.5* and *ISL1*) markers in H9, LM and epicardial cells after 5 (EPI D5) and 10 (EPI D10) days of differentiation. Significant differences compared to H9 are indicated in black, whereas differences between groups are indicated in red. \*\*\* $P < 0.001$ , \*\* $P < 0.01$ , \* $P < 0.05$ .

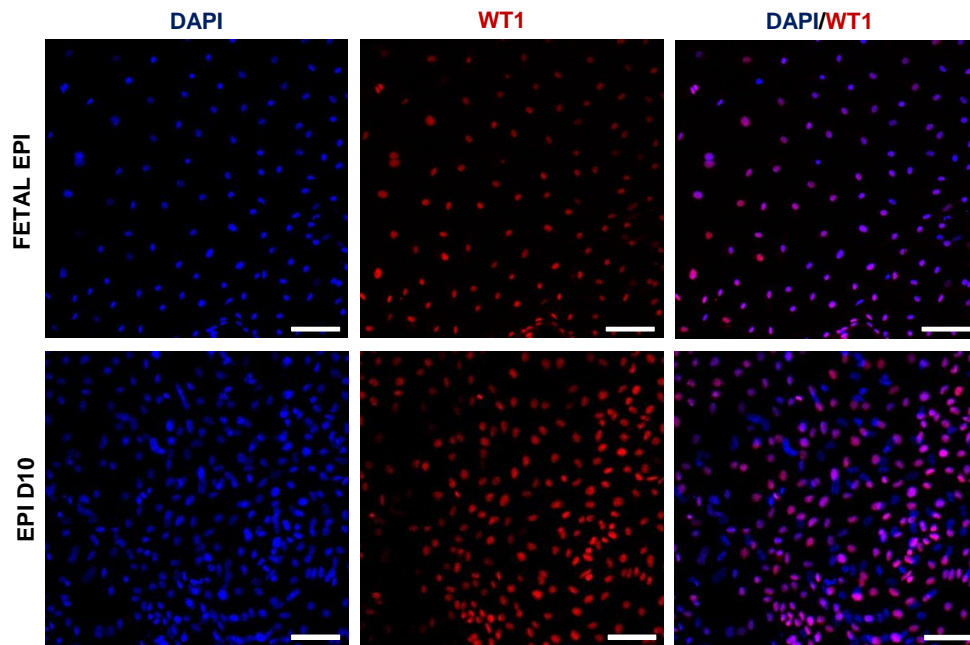

**Fig. S4. HESC-derived epicardial cells are similar to human fetal epicardium.** Human fetal epicardial outgrowths (FETAL EPI) and H9-derived epicardial cells (EPI D10) displayed similar WT1 expression. Scale bar, 100  $\mu$ m.

**A**

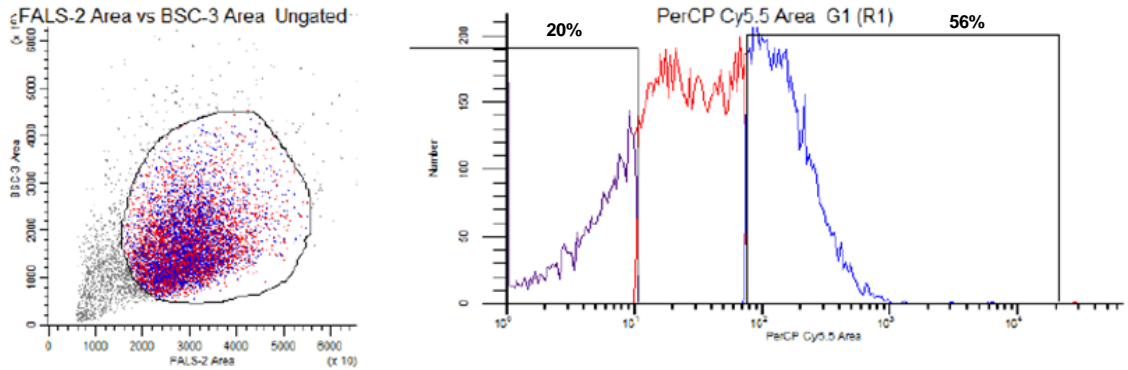

**B**

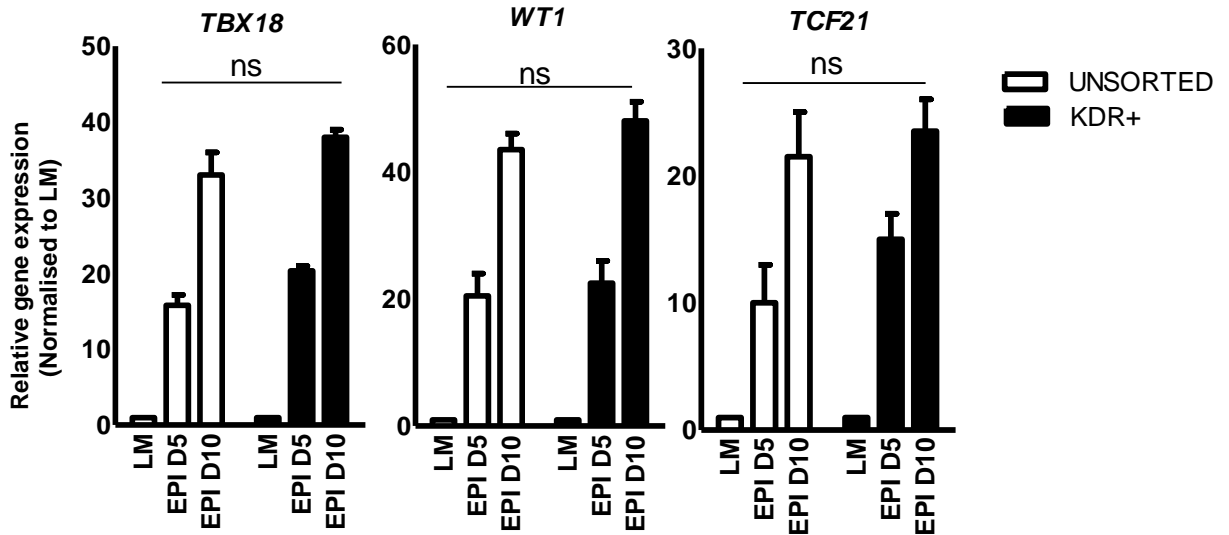

**Fig. S5. Epicardium differentiation from flow sorted lateral plate mesoderm (LM).** (A) Sort plot demonstrating 56% KDR<sup>+</sup> (blue) and 20% KDR<sup>-</sup> (purple) LM cells. (B) Analysis of epicardial genes by qRT-PCR in epicardium-like cells derived from flow sorted and unsorted LM. Comparisons between the sorted and unsorted groups were made using Two-Way ANOVA.

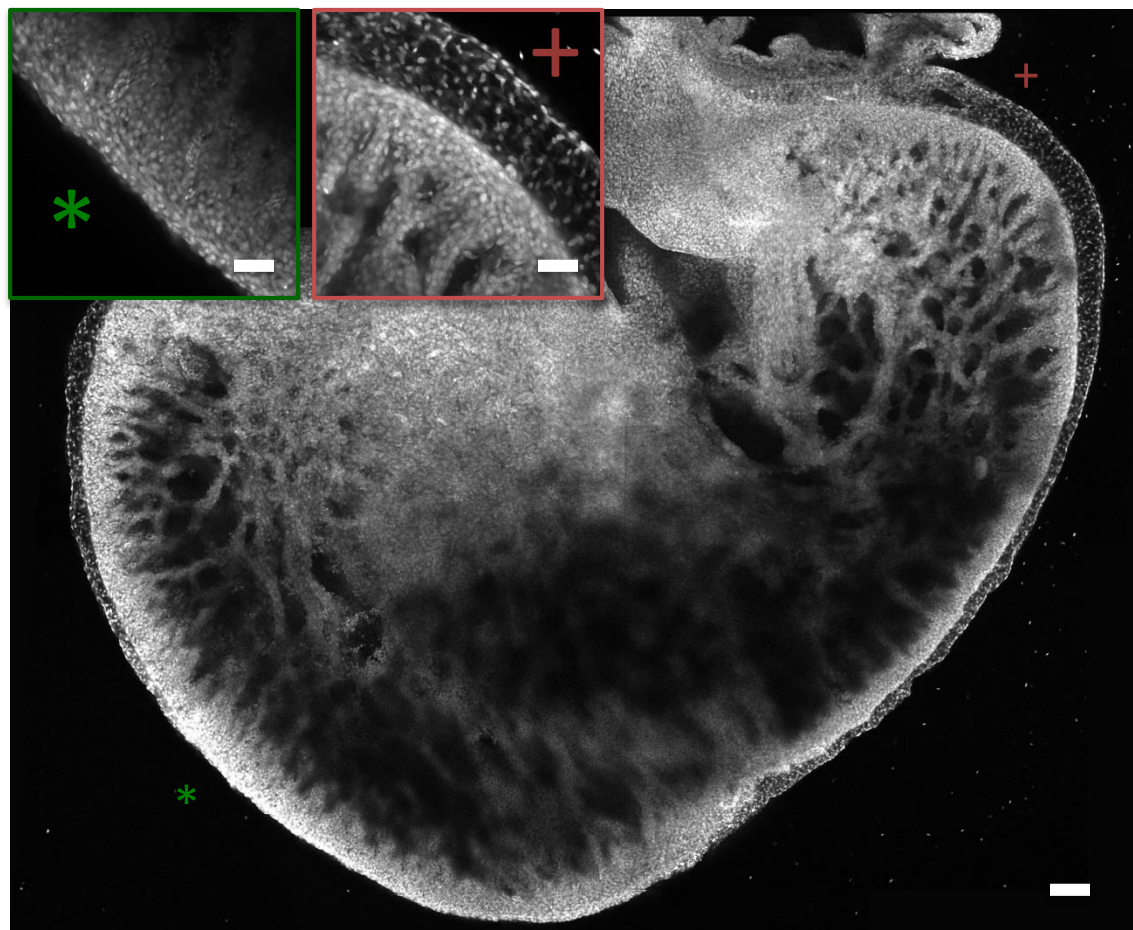

**Fig. S6. Localisation of human epicardial cells in the subepicardial/epicardial region *in vivo*.** A chicken heart at HH34 reconstructed from confocal sections. GFP<sup>+</sup> or mStrawb<sup>+</sup> epicardial cells were mostly seen in the subepicardial space between the epicardium and myocardium at the base of the heart (indicated by red +). WT1 expressing epicardial cells were spotted at the apex of the heart (indicated by green\*) where the epicardial/subepicardial region was relatively thinner. The scale bar represents 285  $\mu$ m in the large panel and 100  $\mu$ m in the two small inserted panels.

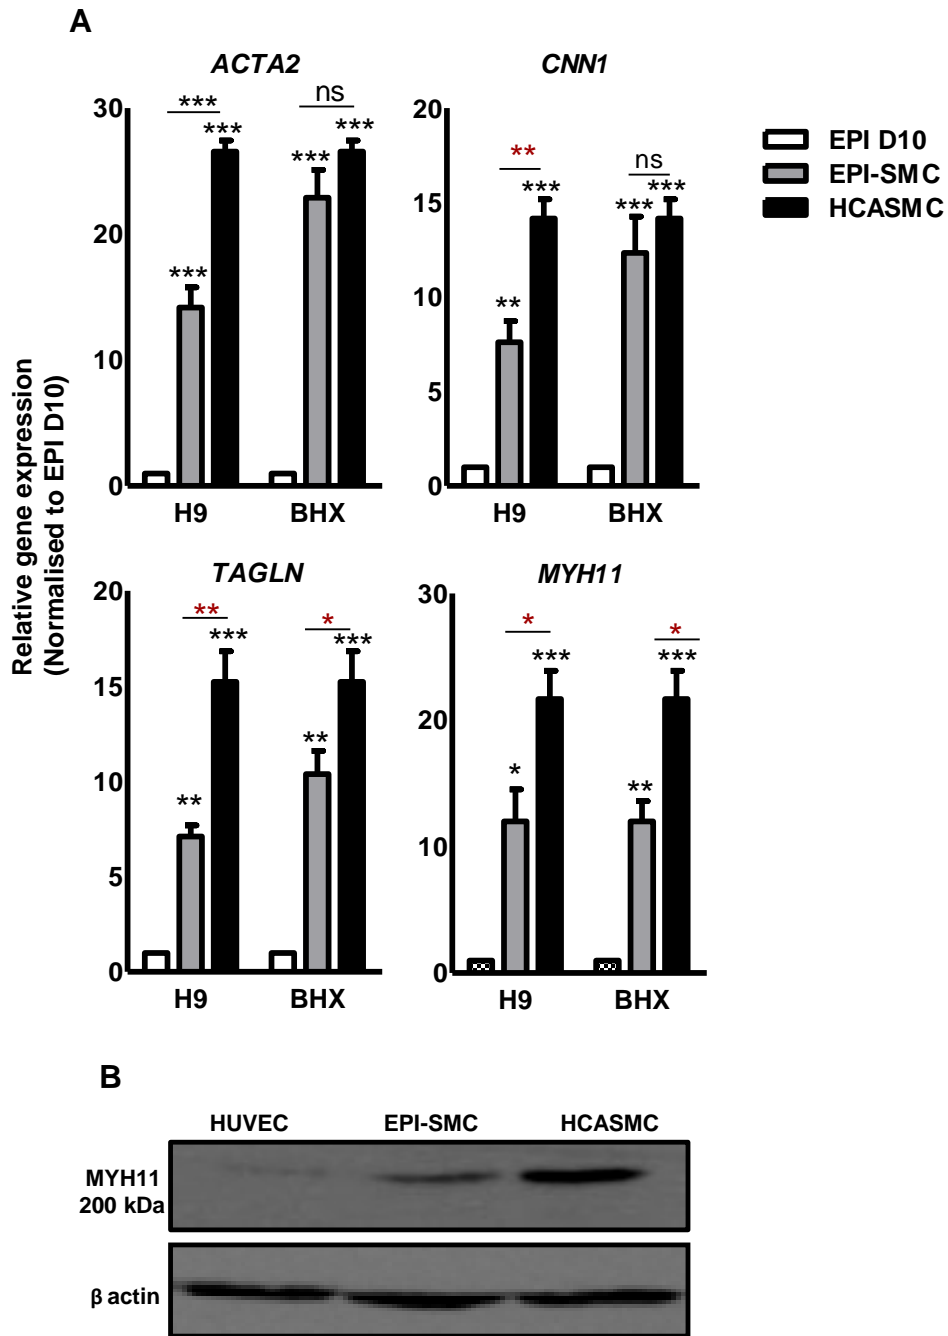

**Fig. S7. HPSC-derived epicardial cells differentiate into mature vascular SMCs.**

(A) Analysis of SMC markers in epicardium-derived SMCs (EPI-SMC) generated from H9 HESCs and BHX HiPSCs and their comparison with human coronary artery SMCs (HCASCs) by qRT-PCR. Significant differences compared to day 10 epicardium (EPI D10) are indicated in black, whereas differences between groups are indicated in red. \*\*\* $P < 0.001$ , \*\* $P < 0.01$ , \* $P < 0.05$ . (B) Western Blot analysis of mature SMC protein MYH11 in human umbilical vein endothelial cells (HUVECs), EPI-SMCs and HCASCs.  $\beta$ -actin was used as loading control.

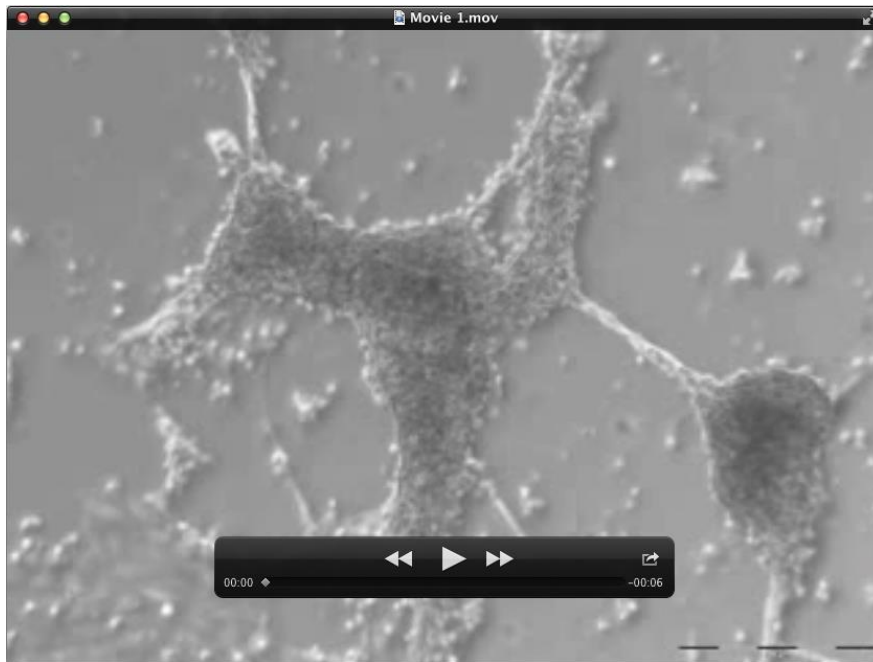

Movie 1 : This movie shows beating cardiomyocytes that were derived from human embryonic stem cells. These cells were used as a positive control in figure S3 to examine the expression of myocardial marker TNNT2.



**Table S1**

| <b>Gene</b> | <b>Sequence</b>                                       |
|-------------|-------------------------------------------------------|
| NKX2.5      | AGCCGAAAAGAAAGAGCTGTGCG<br>GACCTGCGCCTGCGAGAAGAG      |
| ISL1        | GCAAATGGCAGCGGAGCCCA<br>AGCAGGTCCGCAAGGTGTGC          |
| FOXF1       | GTACCCGCACCACGACAGCTC<br>ATACCGCGGGATGCCTTGCAG        |
| PITX2       | GCGTGTGTGCAATTAGGCG<br>AAAGTGAGTCCGCTGCCGCC           |
| PBGD        | GGAGCCATGTCTGGTAACGG<br>CCACGCGAATCACTCTCATCT         |
| TBX18       | ACTCCGGGCGCAACAGAATGG<br>TGGGCCCCAGATGGAAGGCA         |
| WT1         | TCCGGCCCAGTTTGTAGTAGA<br>AGCAGGGCTCGCTGGGTGAG         |
| TCF21       | GAAGTGGTGACCGCGAGCCG<br>AGTGTCTCGCGGGGTGGGA           |
| BNC1        | GGGAACTGTGAAGGGTCGAG<br>TCGACTGCGAACAGACGAAA          |
| UPK1B       | AGGACAATTGCTGTGGCGTA<br>GGAGAACCCAAAAAGTCCAGC         |
| ANXA8       | ACACGAATCCATCCAACCGAGAT<br>AACACAGTGTCCCTTGGGTCAGGAA  |
| ACTA2       | CACTGTCAGGAATCCTGTGA<br>CAAAGCCGGCCTTACAGA            |
| CNN1        | GTCCACCCTCCTGGCTTT<br>AAACTTGTTGGTGCCCATCT            |
| TAGLN       | TCTTTGAAGGCAAAGACATGG<br>TTATGCTCCTGCGCTTTCTT         |
| MYH11       | AGATGGTTCTGAGGAGGAAACG<br>AAAACCTGTAGAAAGTTGCTTATCACT |
| CDH1        | GGCTGGACCGAGAGAGTTTC<br>CGACGTTAGCCTCGTTCTCA          |

|        |                                                     |
|--------|-----------------------------------------------------|
| VIM    | GAAGGCGAGGAGAGCAGGATT<br>CAAGGTCATCGTGATGCTGAG      |
| OCN    | CGGCGAGCGGATTGGTT<br>TAGGCTGGCTGAGAGAGCATT          |
| ZEB1   | CATATTGAGCTGTTGCCGCTG<br>TCTTGCCCTTCCTTTCCTGTGT     |
| NANOG  | TCCTGAACCTCAGCTACAAACA<br>GGTAGGTGCTGAGGCCTTCT      |
| POU5F1 | GTGGGGGCAGGGGAGTTTGG<br>AGTGTGTCTATCTACTGTGTCCCAGGC |
| CD34   | CACAGGAGAAAGGCTGGGCGA<br>TGGCCGTTTCTGGAGGTGGC       |
| POSTN  | CCCGTGA CTGTCTATAAGCCAA<br>GTGTGTCTCCCTGAAGCAGT     |
| DDR2   | TTCTTTTTGGGTTGGGGAAACG<br>TGGGTCCTGGGAGGCATATCA     |
| NOS3   | AAGGCTTTTGATCCCCGGGTCCT<br>TCTCCATCAGGGCAGCTGCAAAG  |
| PDGFRA | ATCGGAGGAGAAGTTTCCCAGAG<br>GGTACTGCCAGCTCACTTCA     |

**Table S2**

| <b>Marker</b> | <b>Application</b>  | <b>Concentration</b>                         | <b>Manufacturer</b>                       |
|---------------|---------------------|----------------------------------------------|-------------------------------------------|
| ISL1          | Flow cytometry      | 1:200                                        | Abcam (ab26122)                           |
|               | Immunocytochemistry | 1:250                                        |                                           |
| KDR-PerCP     | Flow cytometry      | 10µl added to 100µl of 10 <sup>6</sup> cells | R&D Systems (FAB357C)                     |
| NKX2-5        | Immunocytochemistry | 1:200                                        | Santa Cruz (SC-14033)                     |
| WT1           | Flow cytometry      | 1:100                                        | Abcam (ab89901)                           |
|               | Immunocytochemistry | 1:50                                         |                                           |
|               | Western Blot        | 1:1000                                       |                                           |
| BNC1          | Immunocytochemistry | 1:50                                         | Dr Shiro Luchi and Professor Howard Green |
| TCF21         | Western Blot        | 1:250                                        | Abcam (ab170395)                          |
| ACTA2-FITC    | Flow cytometry      | 1:400                                        | Sigma (F3777)                             |
|               | Immunocytochemistry | 1:400                                        |                                           |
| CNN1          | Flow cytometry      | 1: 15000                                     | Sigma (C2687)                             |
|               | Immunocytochemistry | 1: 15000                                     |                                           |
| TAGLN         | Immunocytochemistry | 1:1000                                       | Abcam (ab14106)                           |
| ACTA2         | Whole mount         | 1:200                                        | Dako (M0851)                              |
|               | Immunofluorescence  |                                              |                                           |
| MYH11         | Western blot        | 1:5000                                       | Sigma (M7786)                             |
| DDR2          | Immunocytochemistry | 1:200                                        | Santa Cruz (sc7555)                       |
| POSTN         | Flow cytometry      | 1:500                                        | Abcam (ab14041)                           |

|                |                                   |        |               |
|----------------|-----------------------------------|--------|---------------|
| HOECHST 33342  | Whole mount<br>immunofluorescence | 1:250  | Sigma (14533) |
| $\beta$ -ACTIN | Western blot                      | 1:5000 | Sigma (A1978) |
